# Supplementary material for: The solution stability of copper(i) and silver(i) complexes with N-heterocyclic carbenes
Source: Royal Society of Chemistry journal article supplement (doi:10.1039/c1dt10894h), 2011-01-01
Supplement: c1dt10894h.pdf [file c1dt10894h.pdf]

## **The solution stability of copper(I) and silver(I) complexes with *N*-heterocyclic carbenes**

**Valeria Amendola, Greta Bergamaschi, Massimo Boiocchi, Luigi Fabbrizzi,\* and Nadia Fusco**

### **SUPPLEMENTARY INFORMATION**

1. X-ray diffraction studies (with Table 1 and Figures S1, S2 and S3)
2. <sup>1</sup>H NMR spectra of [Cu<sup>I</sup>(LH)]<sup>2+</sup> and [Cu<sup>I</sup>(LH)]<sup>2+</sup> (with Figures S4 and S5)

## 1. X-ray crystallographic studies

Diffraction data for  $[\text{LH}_3]\text{Br}_3 \cdot 7.7\text{H}_2\text{O}$  and  $[\text{Cu}^{\text{I}}(\text{LH})](\text{ClO}_4)_2$  have been collected at ambient temperature by means of Bruker-Axs CCD-based diffractometer. Diffraction data for  $[\text{Ag}^{\text{I}}(\text{LH})](\text{NO}_3)_2 \cdot 5\text{H}_2\text{O}$  have been collected at ambient temperature by means of an Enraf-Nonius CAD4 four circle diffractometer equipped with a punctual detector (scintillation counter). Both diffractometers work with graphite-monochromatized  $\text{MoK}\alpha$  X-radiation ( $\lambda = 0.71073 \text{ \AA}$ ). Data reductions (including intensity integration, background, Lorentz and polarization corrections) for intensities collected with the conventional diffractometer were performed with the WinGX package;<sup>1</sup> absorption effects were evaluated with the psi-scan method,<sup>2</sup> and absorption correction was applied to the data. Frames collected by the CCD-based system were processed with the SAINT software,<sup>3</sup> and intensities were corrected for Lorentz and polarization effects; absorption effects were empirically evaluated by the SADABS software<sup>4</sup> and absorption correction was applied to the data.

All crystal structures were solved by direct methods (SIR 97)<sup>5</sup> and refined by full-matrix least-square procedures on  $F^2$  using all reflections (SHELXL 97).<sup>6</sup> Anisotropic displacement parameters were refined for all non-hydrogen atoms. Hydrogen atoms belonging to the tris-benzimidazolium cages were placed at calculated positions with the appropriate AFIX instructions and refined using a riding model.

Several kinds of disorder affect two of the studied crystal structures. In particular, the crystalline hydrate salt  $[\text{LH}_3]\text{Br}_3 \cdot 7.7\text{H}_2\text{O}$  has the three bromide counterions and the not stoichiometric water solvent molecules placed on partly populated atom sites; some of them are mutually exclusive. The  $[\text{Cu}^{\text{I}}(\text{LH})](\text{ClO}_4)_2$  is characterized by positional disorder affecting the  $\text{Cu}^{\text{I}}$  species. The copper(I) results disordered over two alternative positions with very different occupancies: 0.93(1) vs. 0.07(1). This means that also the atoms forming the cage should be disordered over alternative positions corresponding to the two geometrical arrangements suitable to satisfy the bonding requirements of the two Cu atom sites. However, the secondary arrangement occurs only in 7% of the unit cells forming the crystal and the features of the cage in this minority portion of the crystal cannot be characterized through X-ray diffraction analysis. Interestingly, a similar disorder for the metal species and a proposed but unresolved disorder for the cage have been detected in the  $[\text{Ag}^{\text{I}}(\text{NH})]^{2+}$  complex obtained from the tris-imidazolium cage,<sup>7</sup> whereas it does not occur in our  $[\text{Ag}^{\text{I}}(\text{LH})]^{2+}$  complex obtained from the tris-benzimidazolium cage.

Crystal data for the three molecular complexes are shown in Table S1. ORTEP views for the three molecular cages are shown in Figure S1, S2, S3.

**Table S1.** Crystal data for investigated crystals

|                                                                            | [LH <sub>3</sub> ]Br <sub>3</sub> ·7.7H <sub>2</sub> O                            | [Cu <sup>I</sup> (LH)](ClO <sub>4</sub> ) <sub>2</sub>                                          | Ag <sup>I</sup> (LH)](NO <sub>3</sub> ) <sub>2</sub> ·5H <sub>2</sub> O |
|----------------------------------------------------------------------------|-----------------------------------------------------------------------------------|-------------------------------------------------------------------------------------------------|-------------------------------------------------------------------------|
| Formula                                                                    | C <sub>45</sub> H <sub>60.4</sub> Br <sub>3</sub> N <sub>6</sub> O <sub>7.7</sub> | C <sub>90</sub> H <sub>86</sub> Cl <sub>4</sub> Cu <sub>2</sub> N <sub>12</sub> O <sub>16</sub> | C <sub>45</sub> H <sub>53</sub> AgN <sub>8</sub> O <sub>11</sub>        |
| <i>M</i> [g/mol]                                                           | 1048.38                                                                           | 1860.60                                                                                         | 989.74                                                                  |
| dimension[mm]                                                              | 0.30x0.15x0.05                                                                    | 0.30x0.25x0.18                                                                                  | 0.70x0.50x0.40                                                          |
| colour                                                                     | colourless                                                                        | colourless                                                                                      | colourless                                                              |
| Crystal system                                                             | monoclinic                                                                        | monoclinic                                                                                      | orthorhombic                                                            |
| Space group                                                                | <i>C</i> 2/ <i>m</i> (no. 12)                                                     | <i>P</i> 2 <sub>1</sub> / <i>n</i> (no. 14)                                                     | <i>Ibmm</i> (no. 74)                                                    |
| <i>a</i> [Å]                                                               | 21.808(2)                                                                         | 15.002(1)                                                                                       | 15.243(7)                                                               |
| <i>b</i> [Å]                                                               | 17.048(2)                                                                         | 25.618(1)                                                                                       | 17.179(8)                                                               |
| <i>c</i> [Å]                                                               | 15.933(2)                                                                         | 21.941(1)                                                                                       | 17.400(6)                                                               |
| $\beta$ [°]                                                                | 120.49(1)                                                                         | 97.80(1)                                                                                        | 90.00                                                                   |
| <i>V</i> [Å <sup>3</sup> ]                                                 | 5104.7(9)                                                                         | 8354.2(1)                                                                                       | 4556.3(28)                                                              |
| <i>Z</i>                                                                   | 4                                                                                 | 4                                                                                               | 4                                                                       |
| $\rho_{\text{calcd}}$ [g/cm <sup>3</sup> ]                                 | 1.364                                                                             | 1.479                                                                                           | 1.443                                                                   |
| $\mu$ Mo K $\alpha$ [mm <sup>-1</sup> ]                                    | 2.424                                                                             | 0.714                                                                                           | 0.511                                                                   |
| <i>F</i> (000)                                                             | 2156                                                                              | 3856                                                                                            | 2056                                                                    |
| $\theta$ range [°]                                                         | 2-25                                                                              | 2-25                                                                                            | 2-25                                                                    |
| Measured refl.                                                             | 20614                                                                             | 79425                                                                                           | 4231                                                                    |
| Unique refl.                                                               | 4666                                                                              | 14809                                                                                           | 2163                                                                    |
| <i>R</i> <sub>int</sub>                                                    | 0.0409                                                                            | 0.0162                                                                                          | 0.0332                                                                  |
| min/max transmission                                                       | 0.72/0.98                                                                         | 0.76/0.98                                                                                       | 0.73/0.78                                                               |
| Strong data ( <i>I</i> <sub>0</sub> >2 $\sigma$ ( <i>I</i> <sub>0</sub> )) | 3442                                                                              | 10539                                                                                           | 1503                                                                    |
| Refined parameters                                                         | 327                                                                               | 1136                                                                                            | 170                                                                     |
| <i>R</i> <i>I</i> , <i>wR</i> 2 (strong data)                              | 0.0716, 0.2118                                                                    | 0.0744, 0.2214                                                                                  | 0.0914, 0.2487                                                          |
| <i>R</i> <i>I</i> , <i>wR</i> 2 (all data)                                 | 0.0909, 0.2331                                                                    | 0.0989, 0.2482                                                                                  | 0.1151, 0.2719                                                          |
| GOF                                                                        | 1.064                                                                             | 1.025                                                                                           | 1.147                                                                   |
| Max/min residuals [e <sup>-3</sup> ]                                       | 0.99/-0.31                                                                        | 1.29/-0.56                                                                                      | 0.84/-0.78                                                              |

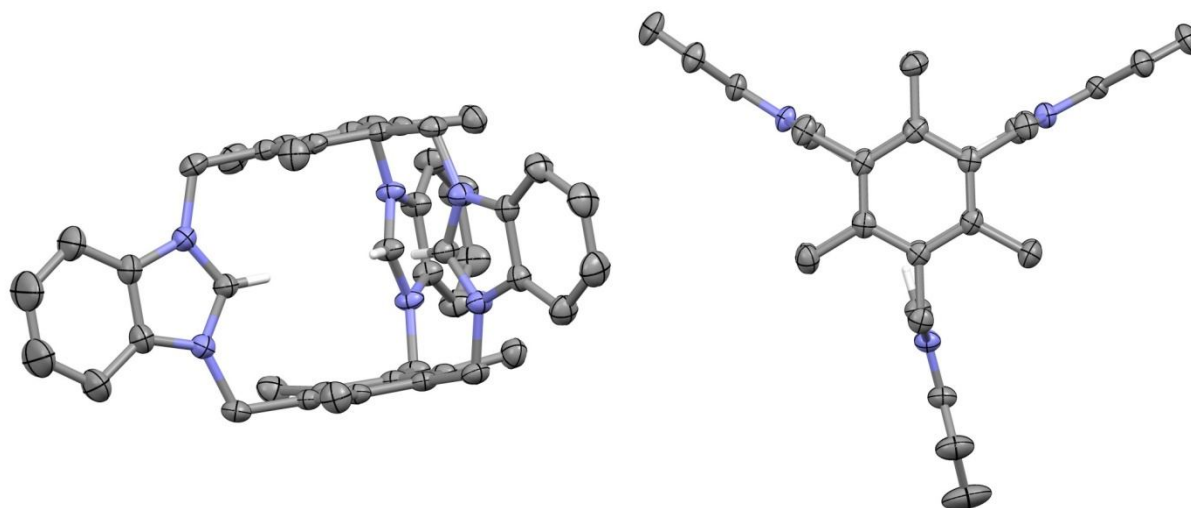

**Figure S1.** Lateral and top ORTEP views of the [LH<sub>3</sub>]<sup>3+</sup> molecular cage: ellipsoids are drawn at the 30% probability level; only H atoms belonging to the imidazolium moieties are shown; bromide counterions and water solvent molecules have been omitted for clarity.

S4

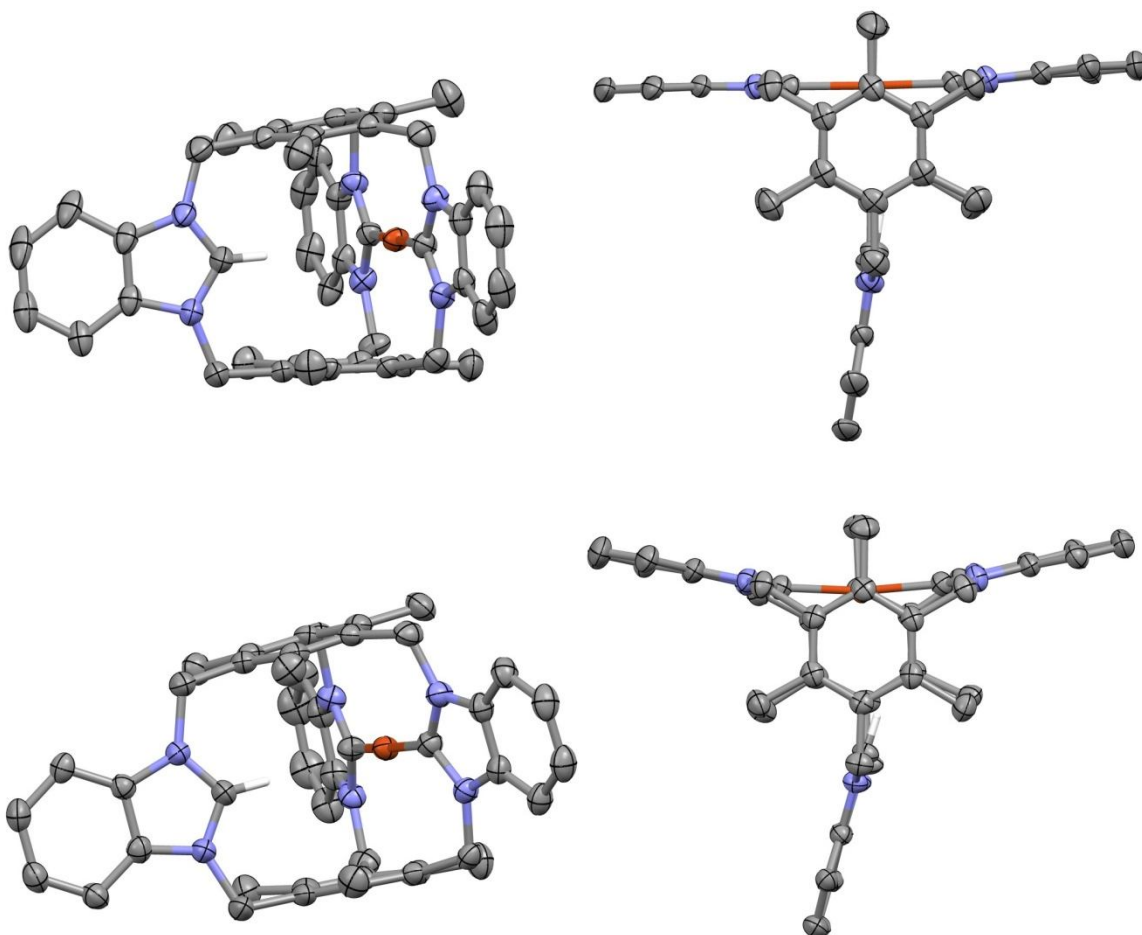

**Figure S2.** Lateral and top ORTEP views of the two not symmetrically equivalent  $[\text{Cu}^{\text{I}}(\text{LH})]^{2+}$  cation molecular complexes forming the crystal: ellipsoids are drawn at the 30% probability level; only H atoms belonging to the imidazolium moiety is shown; perchlorate counterions have been omitted for clarity.

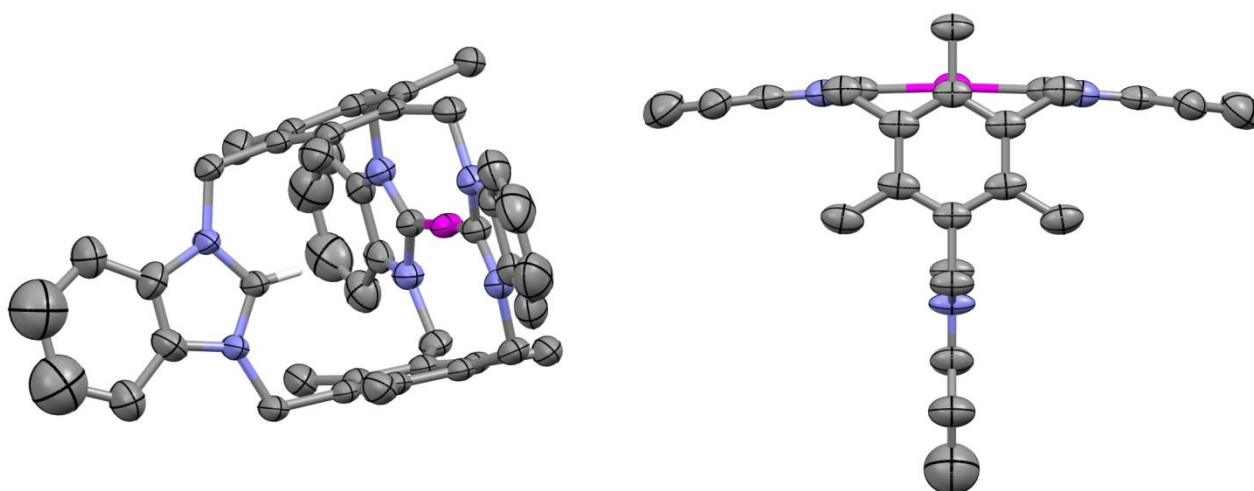

**Figure S3.** Lateral and top ORTEP views of the  $[\text{Ag}^{\text{I}}(\text{LH})]^{2+}$  cation molecular complex: ellipsoids are drawn at the 30% probability level; only H atoms belonging to the imidazolium moiety is shown; nitrate counterions and water solvent molecules have been omitted for clarity.

## References

- (1) Farrugia, L. J. *J. Appl. Crystallogr.* **1999**, *32*, 837-838.
- (2) North, A. C. T., Phillips, D.C., Mathews, F. S. *Acta. Crystallogr.* **1968**, *A24*, 351-359.
- (3) Bruker *SAINT Software Reference Manual. Version 6*. Bruker AXS Inc., Madison, Wisconsin, USA, **2003**.
- (4) Sheldrick, G. M. *SADABS Siemens Area Detector Absorption Correction Program*. University of Göttingen, Göttingen, Germany, **1996**.
- (5) Altomare, A., Burla, M. C., Camalli, M., Cascarano, G. L., Giacovazzo, C., Guagliardi, A., Moliterni, A. G. G., Polidori, G., Spagna R. *J. Appl. Crystallogr.* **1999**, *32*, 115-119.
- (6) Sheldrick, G. M. *SHELX97 Programs for Crystal Structure Analysis*. University of Göttingen, Göttingen, Germany, **1997**.
- (7) Willans, C. E., Anderson, K. M., Junk, P. C., Barbour, L. J., Steed, J. W. *Chem. Commun.* **2007**, 3634-3636.

## 2. $^1\text{H}$ NMR spectra

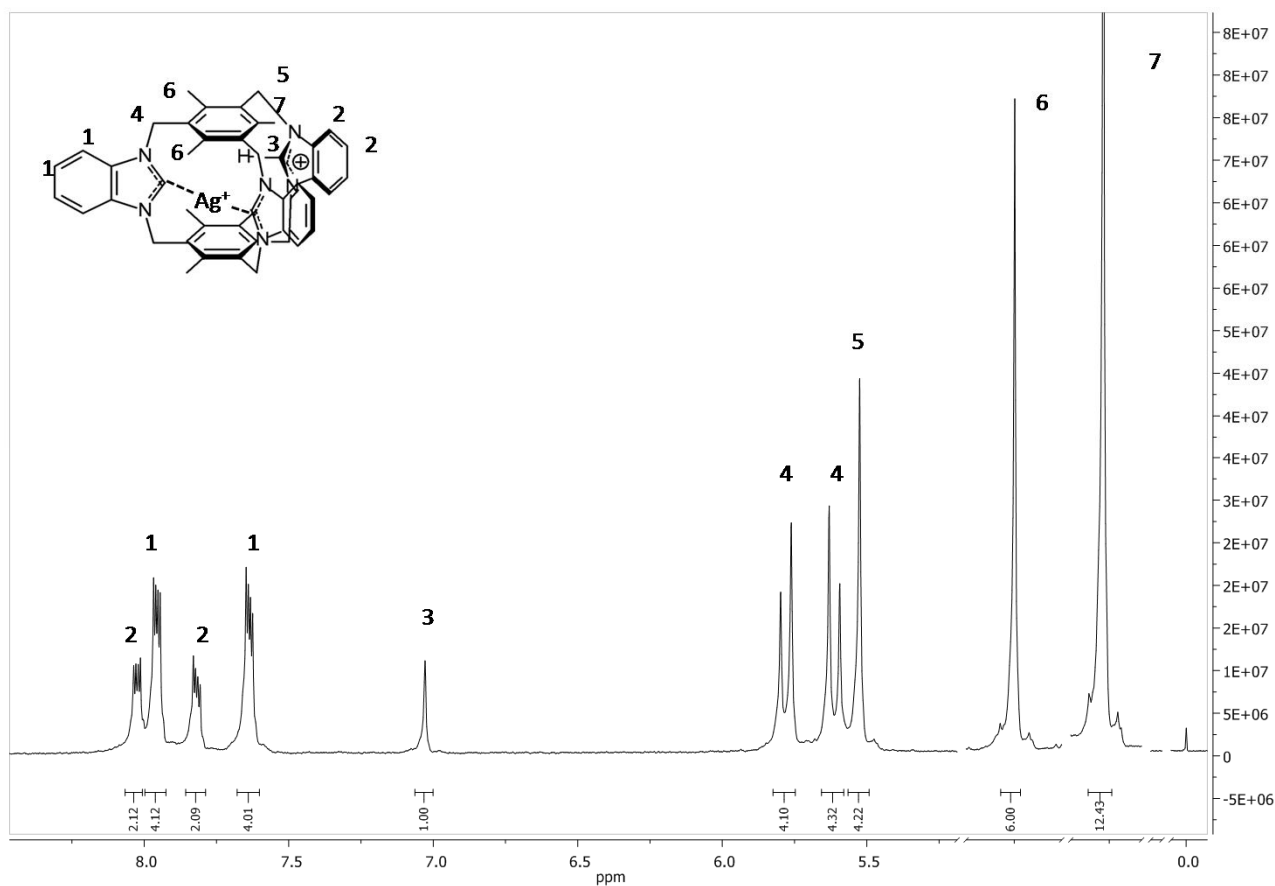

**Figure S4.**  $^1\text{H}$ -NMR spectrum of  $[\text{Ag}^{\text{I}}(\text{LH})]^{2+}$  complex in  $\text{CD}_3\text{CN}$ . Splitting of 1-7 proton signals indicates the three benzo-heterocyclic moieties are not equivalent, as expected from the circumstance that two are bound to the  $\text{Ag}^{\text{I}}$  as carbenes, whereas the third one exhibits an imidazolium nature (signal 3).

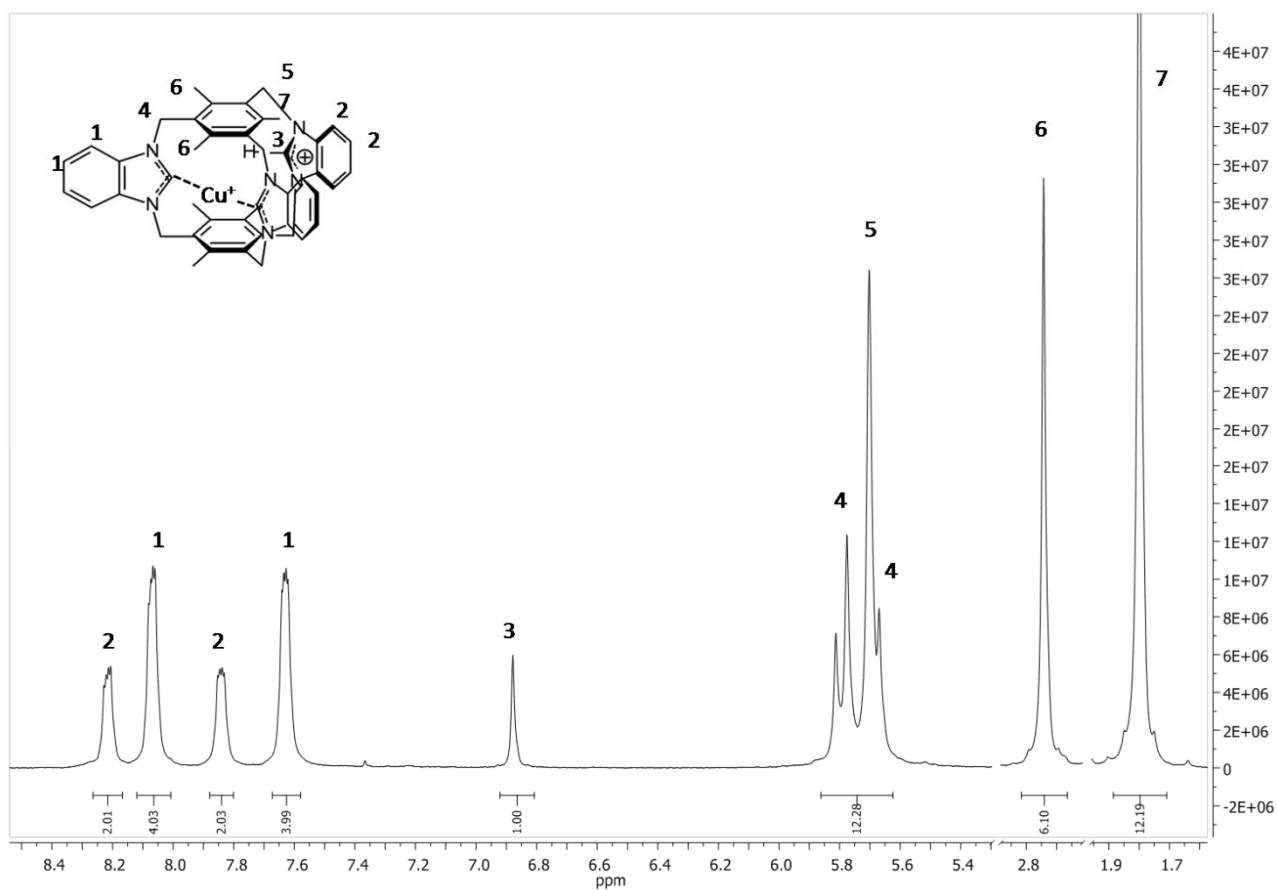

**Figure S5.** <sup>1</sup>H-NMR spectrum of [Cu<sup>I</sup>(LH)]<sup>2+</sup> complex in DMSO-d<sub>6</sub>. Splitting of 1-7 proton signals indicates the three benzo-heterocyclic moieties are not equivalent, as expected from the circumstance that two are bound to the Cu<sup>I</sup> as carbenes, whereas the third one exhibits an imidazolium nature (signal 3).
